# Supplementary material
Source: publisher figshare collection journal article supplement (https://acs.figshare.com/ndownloader/files/9653917)
Supplement: Supplementary file 1 [file 9653917]

## SUPPORTING INFORMATION

### **Improvement of Cell Permeability of Human Neuronal Nitric Oxide Synthase Inhibitors Using Potent and Selective 2-Aminopyridine-Based Scaffolds with a Fluorobenzene Linker**

Ha T. Do,<sup>†‡</sup> Heng-Yen Wang,<sup>†‡</sup> Huiying Li,<sup>§</sup> Georges Chreifi,<sup>§</sup> Thomas L. Poulos,<sup>§,\*</sup> and Richard B. Silverman<sup>†,\*</sup>

<sup>†</sup>Department of Chemistry, Department of Molecular Biosciences, Chemistry of Life Processes Institute, Center for Molecular Innovation and Drug Discovery, Center for Developmental Therapeutics, Northwestern University, 2145 Sheridan Road, Evanston, Illinois 60208-3113, United States

<sup>§</sup>Departments of Molecular Biology and Biochemistry, Pharmaceutical Sciences, and Chemistry, University of California, Irvine, California 92697-3900, United States

<sup>‡</sup> These authors contributed equally.

## Table of Contents

|                                                                                                                  |     |
|------------------------------------------------------------------------------------------------------------------|-----|
| Table S1. Crystallographic data collection and refinement statistics                                             | S3  |
| Figure S1. Active site structure of <b>7</b> bound to rnNOS (A) and hnNOS (B)                                    | S9  |
| Figure S2. Active site structures of <b>13</b> bound to rnNOS (A) and hnNOS (B)                                  | S10 |
| Figure S3. Active site structure of <b>10</b> bound to rnNOS (A) and hnNOS (B)                                   | S11 |
| Figure S4. The compound <b>11</b> in ref. 22 bound to rnNOS and compound <b>19c</b><br>in ref. 24 bound to rnNOS | S12 |
| Figure S5. The UV-Vis absorption spectrum of hemoglobin without and in<br>the presence of compound <b>12</b>     | S13 |
| Synthesis of <b>20</b> , <b>23a</b> and <b>31a</b>                                                               | S14 |
| Synthesis of intermediates <b>22a-d</b> : general procedure SA                                                   | S16 |
| Synthesis of intermediate <b>27</b>                                                                              | S17 |
| References                                                                                                       | S18 |

**Table S1.** Crystallographic data collection and refinement statistics

| Data set <sup>a</sup>                                            | nNOS-7                                        | nNOS-8                                        | nNOS-10                                       | nNOS-12                                       |
|------------------------------------------------------------------|-----------------------------------------------|-----------------------------------------------|-----------------------------------------------|-----------------------------------------------|
| <b>Data collection</b>                                           |                                               |                                               |                                               |                                               |
| PDB code                                                         | 6AUQ                                          | 6AUR                                          | 6AUS                                          | 6AUT                                          |
| Space group                                                      | P2 <sub>1</sub> 2 <sub>1</sub> 2 <sub>1</sub> |
| Cell dimensions <sup>□ □</sup>                                   |                                               |                                               |                                               |                                               |
| <i>a</i> , <i>b</i> , <i>c</i> (Å)                               | 51.6 111.4 164.4                              | 52.2 110.9 164.2                              | 51.7 110.6 164.2                              | 52.1 111.0 164.4                              |
| Resolution (Å)                                                   | 1.95 (2.02-1.95)                              | 1.75 (1.80-1.75)                              | 1.70 (1.74-1.70)                              | 1.90 (1.96-1.90)                              |
| <i>R</i> <sub>merge</sub>                                        | 0.118 (3.279)                                 | 0.091 (1.278)                                 | 0.071 (2.159)                                 | 0.132 (1.766)                                 |
| <i>R</i> <sub>pim</sub>                                          | 0.088 (2.422)                                 | 0.067 (1.035)                                 | 0.057 (1.872)                                 | 0.098 (1.354)                                 |
| <i>CC 1/2</i>                                                    | 0.997 (0.401)                                 | 0.997 (0.427)                                 | 0.997 (0.455)                                 | 0.995 (0.333)                                 |
| <i>I</i> / $\sigma I$                                            | 8.1 (0.6)                                     | 8.7 (1.0)                                     | 4.7 (0.3)                                     | 7.3 (1.0)                                     |
| No. unique reflections                                           | 70015 (4452)                                  | 96987 (4699)                                  | 104363 (5103)                                 | 75792 (4422)                                  |
| Completeness (%)                                                 | 99.8 (99.8)                                   | 100.0 (99.8)                                  | 99.9 (99.8)                                   | 99.8 (99.8)                                   |
| Redundancy                                                       | 5.0 (5.0)                                     | 5.1 (4.4)                                     | 5.1 (4.1)                                     | 5.0 (4.7)                                     |
| <b>Refinement</b>                                                |                                               |                                               |                                               |                                               |
| Resolution (Å)                                                   | 1.95                                          | 1.75                                          | 1.70                                          | 1.90                                          |
| No. reflections used                                             | 51683 *                                       | 96834                                         | 104038                                        | 75699                                         |
| <i>R</i> <sub>work</sub> / <i>R</i> <sub>free</sub> <sup>b</sup> | 0.191/0.256                                   | 0.182/0.213                                   | 0.192/0.228                                   | 0.194/0.235                                   |
| No. atoms                                                        |                                               |                                               |                                               |                                               |
| Protein                                                          | 6677                                          | 6683                                          | 6692                                          | 6686                                          |
| Ligand/ion                                                       | 171                                           | 173                                           | 175                                           | 175                                           |
| Water                                                            | 403                                           | 649                                           | 506                                           | 486                                           |
| R.m.s. deviations                                                |                                               |                                               |                                               |                                               |
| Bond lengths (Å)                                                 | 0.008                                         | 0.007                                         | 0.007                                         | 0.008                                         |
| Bond angles (deg)                                                | 1.213                                         | 1.183                                         | 1.167                                         | 1.187                                         |

| Data set <sup>a</sup>                                            | nNOS-13                                       | nNOS-16                                       | nNOS-17                                       | nNOS-18                                       |
|------------------------------------------------------------------|-----------------------------------------------|-----------------------------------------------|-----------------------------------------------|-----------------------------------------------|
| <b>Data collection</b>                                           |                                               |                                               |                                               |                                               |
| PDB code                                                         | 6AUU                                          | 6AUV                                          | 6AUW                                          | 6AUX                                          |
| Space group                                                      | P2 <sub>1</sub> 2 <sub>1</sub> 2 <sub>1</sub> |
| Cell dimensions $\square \square$                                |                                               |                                               |                                               |                                               |
| <i>a</i> , <i>b</i> , <i>c</i> (Å)                               | 51.7 111.1 164.5                              | 52.1 111.2 164.2                              | 51.9 111.1 164.0                              | 52.0 110.7 164.3                              |
| Resolution (Å)                                                   | 1.85 (1.90-1.85)                              | 1.76 (1.80-1.76)                              | 1.70 (1.74-1.70)                              | 1.90 (1.96-1.90)                              |
| <i>R</i> <sub>merge</sub>                                        | 0.102 (2.199)                                 | 0.102 (2.807)                                 | 0.077 (4.251)                                 | 0.130 (2.748)                                 |
| <i>R</i> <sub>pim</sub>                                          | 0.087 (1.848)                                 | 0.047 (1.396)                                 | 0.034 (1.924)                                 | 0.066 (1.944)                                 |
| <i>CC</i> 1/2                                                    | 0.997 (0.349)                                 | 0.962 (0.471)                                 | 0.999 (0.558)                                 | 0.998 (0.318)                                 |
| <i>I</i> / $\sigma I$                                            | 5.3 (0.3)                                     | 10.2 (0.5)                                    | 11.2 (0.4)                                    | 9.5 (0.6)                                     |
| No. unique reflections                                           | 81744 (4365)                                  | 95459 (4449)                                  | 104763 (4968)                                 | 75632 (4246)                                  |
| Completeness (%)                                                 | 99.9 (99.8)                                   | 99.6 (95.4)                                   | 99.3 (99.3)                                   | 99.7 (99.7)                                   |
| Redundancy                                                       | 4.0 (4.0)                                     | 5.8 (4.7)                                     | 5.9 (5.5)                                     | 10.1 (5.4)                                    |
| <b>Refinement</b>                                                |                                               |                                               |                                               |                                               |
| Resolution (Å)                                                   | 1.85                                          | 1.76                                          | 1.70                                          | 1.90                                          |
| No. reflections used                                             | 81572                                         | 92803                                         | 101560                                        | 75408                                         |
| <i>R</i> <sub>work</sub> / <i>R</i> <sub>free</sub> <sup>b</sup> | 0.199/0.240                                   | 0.184/0.222                                   | 0.194/0.229                                   | 0.173/0.210                                   |
| No. atoms                                                        |                                               |                                               |                                               |                                               |
| Protein                                                          | 6706                                          | 6743                                          | 6692                                          | 6680                                          |
| Ligand/ion                                                       | 193                                           | 179                                           | 179                                           | 181                                           |
| Water                                                            | 407                                           | 551                                           | 395                                           | 419                                           |
| R.m.s. deviations                                                |                                               |                                               |                                               |                                               |
| Bond lengths (Å)                                                 | 0.008                                         | 0.007                                         | 0.007                                         | 0.007                                         |
| Bond angles (deg)                                                | 1.168                                         | 1.110                                         | 1.112                                         | 0.914                                         |

| Data set <sup>a</sup>                 | hnNOS-7                                       | hnNOS-8                                       | hnNOS-10                                      | hnNOS-12                                      |
|---------------------------------------|-----------------------------------------------|-----------------------------------------------|-----------------------------------------------|-----------------------------------------------|
| <b>Data collection</b>                |                                               |                                               |                                               |                                               |
| PDB code                              | 6AUY                                          | 6AUZ                                          | 6AU0                                          | 6AU1                                          |
| Space group                           | P2 <sub>1</sub> 2 <sub>1</sub> 2 <sub>1</sub> |
| Cell dimensions $\square \square$     |                                               |                                               |                                               |                                               |
| $a, b, c$ (Å)                         | 52.5 122.0 165.1                              | 52.3 122.0 164.5                              | 52.4 122.1 165.0                              | 52.5 121.2 164.1                              |
| Resolution (Å)                        | 1.92 (1.97-1.92)                              | 2.00 (2.07-2.02)                              | 2.00 (2.06-2.00)                              | 2.45 (2.60-2.45)                              |
| $R_{\text{merge}}$                    | 0.107 (5.091)                                 | 0.128 (2.594)                                 | 0.148 (1.761)                                 | 0.230 (1.998)                                 |
| $R_{\text{pim}}$                      | 0.048 (2.276)                                 | 0.095 (1.928)                                 | 0.108 (1.308)                                 | 0.112 (0.956)                                 |
| $CC\ 1/2$                             | 0.998 (0.357)                                 | 0.996 (0.395)                                 | 0.989 (0.619)                                 | 0.990 (0.475)                                 |
| $I / \sigma I$                        | 8.8 (0.4)                                     | 7.5 (0.6)                                     | 5.8 (0.9)                                     | 4.1 (0.7)                                     |
| No. unique reflections                | 81949 (4319)                                  | 72141 (4369)                                  | 72772 (4199)                                  | 39460 (4364)                                  |
| Completeness (%)                      | 99.8 (96.9)                                   | 100.0 (100.0)                                 | 99.6 (93.8)                                   | 100.0 (100.0)                                 |
| Redundancy                            | 5.9 (5.8)                                     | 4.9 (5.0)                                     | 5.3 (5.1)                                     | 5.0 (5.2)                                     |
| <b>Refinement</b>                     |                                               |                                               |                                               |                                               |
| Resolution (Å)                        | 1.92                                          | 2.00                                          | 2.00                                          | 2.45                                          |
| No. reflections used                  | 77143                                         | 71989                                         | 72635                                         | 39227                                         |
| $R_{\text{work}} / R_{\text{free}}^b$ | 0.186/0.236                                   | 0.200/0.243                                   | 0.178/0.218                                   | 0.199/0.267                                   |
| No. atoms                             |                                               |                                               |                                               |                                               |
| Protein                               | 6727                                          | 6705                                          | 6711                                          | 6705                                          |
| Ligand/ion                            | 187                                           | 165                                           | 167                                           | 167                                           |
| Water                                 | 472                                           | 390                                           | 449                                           | 200                                           |
| R.m.s. deviations                     |                                               |                                               |                                               |                                               |
| Bond lengths (Å)                      | 0.007                                         | 0.008                                         | 0.007                                         | 0.008                                         |
| Bond angles (deg)                     | 1.119                                         | 1.133                                         | 1.146                                         | 1.138                                         |

| Data set <sup>a</sup>                 | hnNOS-13                                      | hnNOS-16                                      | hnNOS-17                                      | hnNOS-18                                      |
|---------------------------------------|-----------------------------------------------|-----------------------------------------------|-----------------------------------------------|-----------------------------------------------|
| <b>Data collection</b>                |                                               |                                               |                                               |                                               |
| PDB code                              | 6AU2                                          | 6AU3                                          | 6AU4                                          | 6AU5                                          |
| Space group                           | P2 <sub>1</sub> 2 <sub>1</sub> 2 <sub>1</sub> |
| Cell dimensions $\square \square$     |                                               |                                               |                                               |                                               |
| $a, b, c$ (Å)                         | 52.2 121.5 165.3                              | 52.5 122.3 164.0                              | 52.6 122.4 164.5                              | 52.5 122.3 164.4                              |
| Resolution (Å)                        | 2.10 (2.18-2.10)                              | 1.95 (2.01-1.95)                              | 1.87 (0.92-1.87)                              | 1.90 (1.95-1.90)                              |
| $R_{\text{merge}}$                    | 0.148 (1.689)                                 | 0.131 (4.078)                                 | 0.085 (3.591)                                 | 0.114 (1.688)                                 |
| $R_{\text{pim}}$                      | 0.108 (1.233)                                 | 0.058 (1.855)                                 | 0.038 (1.605)                                 | 0.077 (1.171)                                 |
| $CC\ 1/2$                             | 0.991 (0.416)                                 | 0.998 (0.556)                                 | 0.999 (0.443)                                 | 0.997 (0.462)                                 |
| $I / \sigma I$                        | 6.5 (0.8)                                     | 6.8 (0.4)                                     | 10.4 (0.5)                                    | 8.8 (0.9)                                     |
| No. unique reflections                | 60809 (4365)                                  | 77910 (4441)                                  | 88965 (4351)                                  | 84443 (4412)                                  |
| Completeness (%)                      | 97.9 (96.9)                                   | 99.4 (97.3)                                   | 99.7 (96.0)                                   | 100.0 (100.0)                                 |
| Redundancy                            | 5.4 (5.4)                                     | 5.9 (5.5)                                     | 5.9 (5.7)                                     | 6.1 (6.0)                                     |
| <b>Refinement</b>                     |                                               |                                               |                                               |                                               |
| Resolution (Å)                        | 2.10                                          | 1.95                                          | 1.87                                          | 1.90                                          |
| No. reflections used                  | 60724                                         | 74663                                         | 87538                                         | 84326                                         |
| $R_{\text{work}} / R_{\text{free}}^b$ | 0.181/0.225                                   | 0.203/0.259                                   | 0.188/0.228                                   | 0.184/0.219                                   |
| No. atoms                             |                                               |                                               |                                               |                                               |
| Protein                               | 6723                                          | 6705                                          | 6727                                          | 6728                                          |
| Ligand/ion                            | 172                                           | 169                                           | 145                                           | 173                                           |
| Water                                 | 407                                           | 337                                           | 407                                           | 571                                           |
| R.m.s. deviations                     |                                               |                                               |                                               |                                               |
| Bond lengths (Å)                      | 0.007                                         | 0.007                                         | 0.007                                         | 0.007                                         |
| Bond angles (deg)                     | 1.161                                         | 1.096                                         | 1.075                                         | 0.977                                         |

| Data set <sup>a</sup>                 | heNOS-8          | heNOS-12         |
|---------------------------------------|------------------|------------------|
| <b>Data collection</b>                |                  |                  |
| PDB code                              | 6AU6             | 6AU7             |
| Space group                           | P2 <sub>1</sub>  | P2 <sub>1</sub>  |
| Cell dimensions $\square \square$     |                  |                  |
| $a, b, c$ (Å)                         | 59.6 152.8 108.9 | 59.4 152.4 108.7 |
| $\beta$ (°)                           | 90.8             | 90.8             |
| Resolution (Å)                        | 2.08 (2.13-2.08) | 1.92 (1.96-1.92) |
| $R_{\text{merge}}$                    | 0.169 (2.916)    | 0.093 (3.459)    |
| $R_{\text{pim}}$                      | 0.077 (1.313)    | 0.063 (2.396)    |
| $CC\ 1/2$                             | 0.996 (0.623)    | 0.998 (0.229)    |
| $I / \sigma I$                        | 6.5 (1.0)        | 8.6 (0.4)        |
| No. unique reflections                | 116007 (5716)    | 144907 (6349)    |
| Completeness (%)                      | 99.5 (99.5)      | 97.7 (86.8)      |
| Redundancy                            | 5.4 (5.5)        | 5.8 (5.4)        |
| <b>Refinement</b>                     |                  |                  |
| Resolution (Å)                        | 2.08             | 1.92             |
| No. reflections used                  | 115687           | 140508           |
| $R_{\text{work}} / R_{\text{free}}^b$ | 0.194/0.239      | 0.204/0.254      |
| No. atoms                             |                  |                  |
| Protein                               | 12,857           | 12,888           |
| Ligand/ion                            | 476              | 480              |
| Water                                 | 326              | 354              |
| R.m.s. deviations                     |                  |                  |
| Bond lengths (Å)                      | 0.008            | 0.010            |
| Bond angles (deg)                     | 1.104            | 1.124            |

<sup>a</sup> See Figure 2 for nomenclature and chemical formula of inhibitors.

<sup>b</sup>  $R_{\text{free}}$  was calculated with the 5% of reflections set aside throughout the refinement. The set of reflections for the  $R_{\text{free}}$  calculation were kept the same for all data sets according to those used in the data of the starting model.

\* Reflection file was modified with the Diffraction Anisotropy Server ([services.mbi.ucla.edu](http://services.mbi.ucla.edu)).



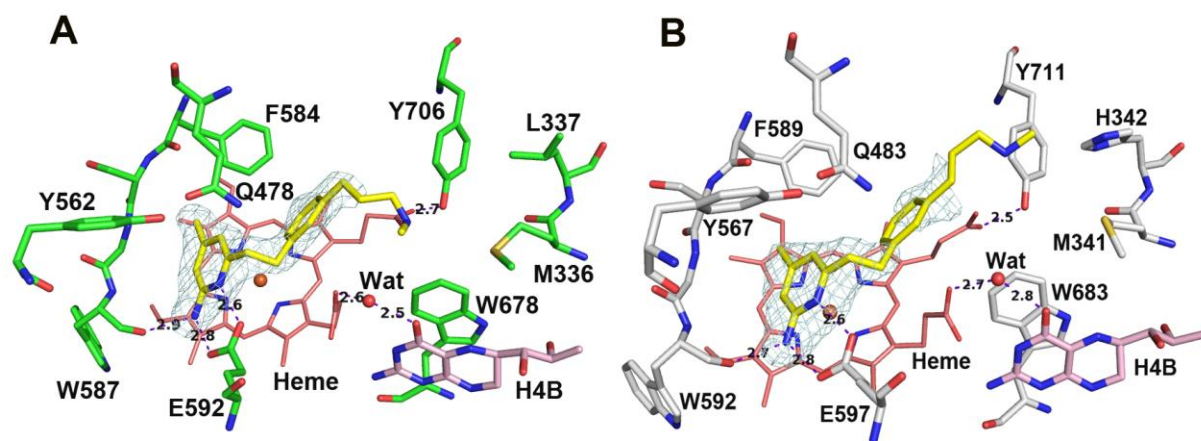

**Figure S1.** Active site structure of **7** bound to rnNOS (A) and hnNOS (B). The long amine tail showed poor density because of its flexibility.



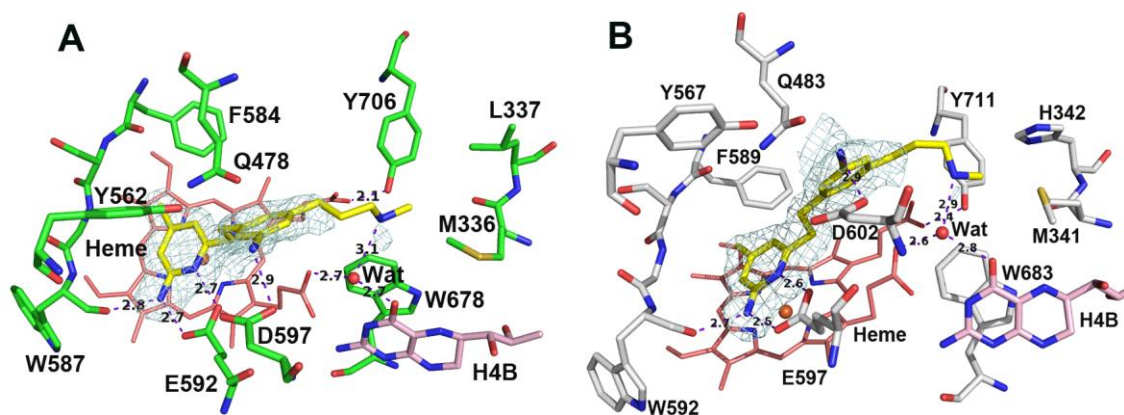

**Figure S3.** Active site structure of **10** bound to rnNOS (A) and hnNOS (B). The 2.9 Å contact from the cyano group to Asp-597 (or Asp-602) can be a H-bond only if the Asp residue is protonated.

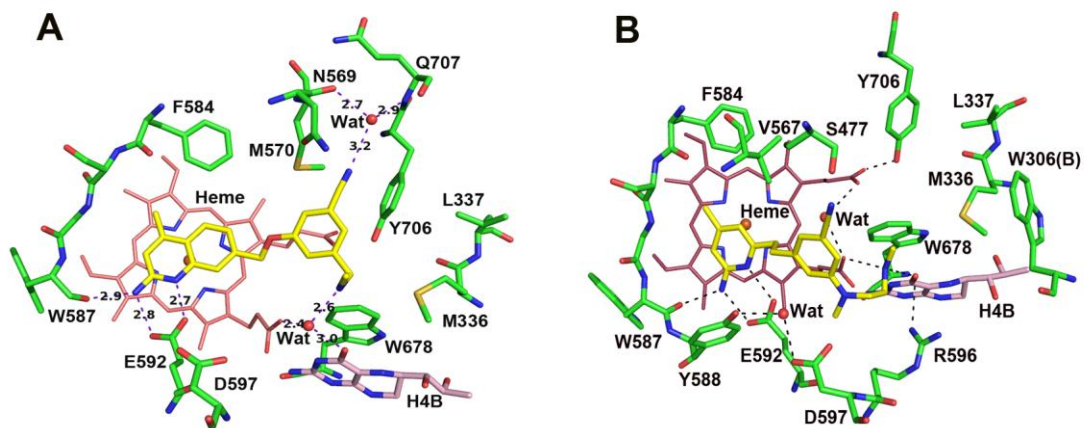

**Figure S4.** (A) Compound **11** in ref. 22 bound to rnNOS (PDB code 5UNU). (B) Compound **19c** in ref. 24 bound to rnNOS (PDB code 4UH4).

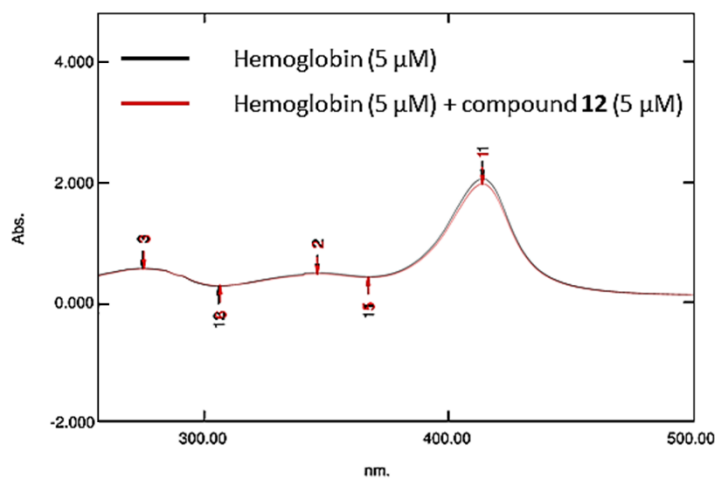

**Figure S5.** UV-vis Spectra of hemoglobin without (black line) and with (red line) the presence of 2-Aminopyridine **12** indicating that there is little to no interaction between 2-Aminopyridines and the heme in hemoglobin. Therefore, the presence of 2-Aminopyridine-bearing NOS inhibitors do not interfere the hemoglobin NO capture assay of NOS inhibition.

## Synthesis of 20, 23a and 31a

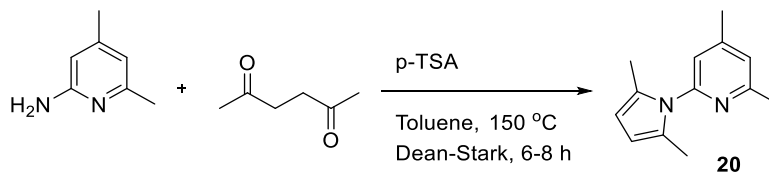

**2-(2,5-Dimethyl-1H-pyrrol-1-yl)-4,6-dimethylpyridine (20).** **20** was synthesized by following a previous report<sup>1</sup> using 2-amino-4,6-dimethylpyridine (1 equiv.) and *p*-TSA (0.1 equiv.), which were dissolved in toluene to make a 0.2 M solution. The reaction mixture was refluxed at 150 °C in a Dean-Stark apparatus. The reaction was monitored by TLC until completion, which takes around 6-8 h. Upon completion, the reaction was allowed to cool, and toluene was removed under reduced pressure. The crude mixture was submitted to flash column chromatography for purification using ethyl acetate and hexanes (1:9) as eluents. **20** was isolated as a light yellow solid (46%). <sup>1</sup>H NMR (500 MHz, CDCl<sub>3</sub>): δ 6.99 (s, 1H), 6.84 (s, 1H), 5.87 (s, 2H), 2.54 (s, 3H), 2.38 (s, 3H), 2.12 (s, 6H); <sup>13</sup>C NMR (125 MHz, CDCl<sub>3</sub>): δ 158.1, 151.5, 149.4, 128.4, 122.9, 119.7, 106.6, 24.1, 20.9, 13.1.

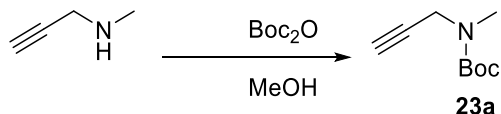

**tert-Butyl-methyl(prop-2-ynyl)carbamate (23a).** **23a** was synthesized similarly to a previous report.<sup>1</sup> To a solution of *N*-methylpropargylamine (1 equiv.) in methanol was added slowly di-*tert*-butyl-dicarbonate (1.05 equiv.) at r.t. The reaction was stirred at r.t overnight. Upon completion, the reaction mixture was concentrated under reduced pressure to give **23a** as a light-yellow oil (87%). <sup>1</sup>H NMR (500 MHz, CDCl<sub>3</sub>): δ 4.00 (brs, 2H), 2.86 (s, 3H), 2.17 (s, 1H), 1.42 (s, 9H); <sup>13</sup>C NMR (125 MHz, CDCl<sub>3</sub>): δ 155.2, 80.1, 79.2, 77.3, 71.6, 33.4, 28.3; MS ESI [M+H]<sup>+</sup> = 170.03.

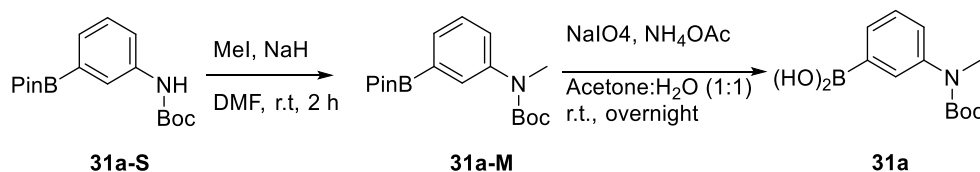

**(3-((*tert*-Butoxycarbonyl)(methyl)amino)phenyl)boronic acid (31a).** **31a** was prepared in two steps from commercially available Boc protected boronic ester **31a-S**. First, **31a-S** (1 equiv.) was dissolved in DMF, forming a 0.5 M solution. NaH (2.37 equiv.) was added slowly to the solution at 0 °C, and the reaction was stirred at the same temperature for 5 min. MeI (1.5 equiv.) was then added dropwise, and the reaction was run for 2 h at r.t. Upon completion, water was added, and the reaction mixture was diluted with ethyl acetate, which was washed with water (3 times) and brine. The organic extract was concentrated under reduced pressure to afford desired product **31a-M** as a yellow oil (88%). <sup>1</sup>H NMR (500 MHz, CDCl<sub>3</sub>):  $\delta$  7.61 (s, 1H), 7.60 – 7.56 (m, 1H), 7.33 – 7.28 (m, 2H), 3.24 (s, 3H), 1.42 (s, 9H), 1.32 (s, 12H).

Crude **31a-M** (1 equiv.), NaIO<sub>4</sub> (1.5 equiv.), and NH<sub>4</sub>OAc (1.5 equiv.) were combined in a round bottom flask and diluted with a mixture of acetone and water (1:1) to form a 0.63 M solution.<sup>2</sup> The reaction mixture was stirred vigorously at r.t. for 18 h. The slurry mixture was then filtered, and acetone was removed under reduced pressure. The aqueous solution was then extracted with CH<sub>2</sub>Cl<sub>2</sub> (3 times), and the combined organic extracts were washed with brine, dried with Na<sub>2</sub>SO<sub>4</sub>, and concentrated to give desired product **31a** as a yellow foam (a quantitative yield).

**General Procedure SA: Pyrrolyl-lutidine and Aryl Bromide Coupling.** A round bottom flask was charged with **20** (1 equiv.), and THF was added to form a 0.2 M solution. *n*-BuLi (1.6 equiv.) was added dropwise to the solution at -78 °C, and the reaction mixture was stirred for 30 min at 0 °C. The mixture was then transferred to a 1 M solution of aryl bromide (**21a**, **21b**, **21c** or **21d**) in THF *via* cannula at -78 °C, which was stirred for an additional 20 min before quenching with H<sub>2</sub>O. The crude reaction mixture was partitioned between ethyl acetate and water, and the organic layer was washed with H<sub>2</sub>O and brine, dried with Na<sub>2</sub>SO<sub>4</sub>, and concentrated under reduced pressure. The crude product was purified by flash column chromatography to give **22a**, **22b**, **22c** or **22d**.

**2-(3-Bromophenethyl)-6-(2,5-dimethyl-1H-pyrrol-1-yl)-4-methylpyridine (22a).** Compound **22a** was synthesized according to general procedure SA using **20** (1.054 g, 5 mmol) and **21a** (1.2398 g, 5 mmol). **22a** was isolated as a light-yellow oil (1.017 g, 55%) after flash column chromatography (ethyl acetate: hexanes 1:19). <sup>1</sup>H NMR (500 MHz, CDCl<sub>3</sub>): δ 7.32-7.30 (m, 2H), 7.14-7.10 (m, 2H), 6.89 (s, 1H), 6.87 (s, 1H), 5.90 (s, 2H), 3.06-3.05 (m, 4H), 2.37 (s, 3H), 2.13 (s, 6H); <sup>13</sup>C NMR (125 MHz, CDCl<sub>3</sub>): δ 160.6, 151.8, 149.6, 143.9, 131.6, 130.0, 129.1, 128.5, 127.2, 122.7, 122.4, 120.3, 106.8, 39.4, 35.3, 21.0, 13.3. MS ESI [M+H]<sup>+</sup> = 369.05.

**2-(3-Bromo-5-fluorophenethyl)-6-(2,5-dimethyl-1H-pyrrol-1-yl)-4-methylpyridine (22b).** Compound **22b** was synthesized according to general procedure SA using **20** (1.035 g, 5 mmol) and **21b** (1.329 g, 5 mmol). **22b** was isolated as a light-yellow oil (1.0948 g, 57%) after flash column chromatography (ethyl acetate: hexanes 1:19). <sup>1</sup>H NMR (500 MHz, CDCl<sub>3</sub>): δ 7.08 (s, 1H), 7.04 (d, *J* = 8.0 Hz, 1H), 6.88 (s, 1H), 6.85 (s, 1H), 6.80 (d, *J* = 9.5 Hz, 1H), 5.87 (s, 2H), 3.04-3.02 (m, 4H), 2.35 (s, 3H), 2.10 (s, 6H); <sup>13</sup>C NMR (125 MHz, CDCl<sub>3</sub>): δ 162.6 (d, *J*<sub>C-F</sub> = 248.6 Hz), 159.9, 151.8, 149.7, 145.6 (d, *J*<sub>C-F</sub> = 7.8 Hz), 128.5, 127.6 (d, *J*<sub>C-F</sub> = 2.9 Hz), 122.7, 122.2 (d, *J*<sub>C-F</sub> = 10.0 Hz), 120.4, 116.7 (d, *J*<sub>C-F</sub> = 24.4 Hz), 114.4 (d, *J*<sub>C-F</sub> = 20.8 Hz), 106.8, 39.0, 35.0, 21.0, 13.2. MS ESI [M+H]<sup>+</sup> = 389.00.

**2-(3-Bromo-5-(trifluoromethyl)phenethyl)-6-(2,5-dimethyl-1H-pyrrol-1-yl)-4-methylpyridine (22c).** Compound **22c** was synthesized according to general procedure SA using **20** (600 mg, 3 mmol) and **21c** (949. mg, 3 mmol). **22c** was isolated as a light-yellow oil (495 mg, 38%) after flash column chromatography (ethyl acetate: hexanes 1:19). <sup>1</sup>H NMR (500 MHz, CDCl<sub>3</sub>): δ 7.56 (s, 1H), 7.48 (s, 1H), 7.28 (s, 1H), 6.87 (s, 1H), 6.85 (s, 1H), 5.88 (s, 2H), 3.13-3.10 (m, 2H), 3.07-3.04 (m, 2H), 2.35 (s, 3H), 2.10 (s, 6H); <sup>13</sup>C NMR (125 MHz, CDCl<sub>3</sub>): δ



159.6, 151.8, 149.7, 135.0, 132.2 (q,  $J_{\text{C-F}} = 32.5$  Hz), 128.5, 126.1 (d,  $J_{\text{C-F}} = 3.8$  Hz), 124.1 (d,  $J_{\text{C-F}} = 3.8$  Hz), 123.2 (q,  $J_{\text{C-F}} = 271.3$  Hz), 122.8, 122.6, 120.5, 120.0, 106.8, 39.0, 35.0, 20.9, 13.2. MS ESI  $[\text{M}+\text{H}]^+ = 439.00$ .

**2-(3,5-Dibromophenethyl)-6-(2,5-dimethyl-1*H*-pyrrol-1-yl)-4-methylpyridine (22d).**

Compound **22d** was synthesized according to general procedure SA using **20** (1.01 g, 5 mmol) and **21d** (1.6629 g, 5 mmol). **22d** was isolated as a light-yellow oil (1.1157 g, 50%) after flash column chromatography (ethyl acetate: hexanes 1:19).  $^1\text{H}$  NMR (500 MHz,  $\text{CDCl}_3$ ):  $\delta$  7.46 (s, 1H), 7.22 (s, 1H), 7.21 (s, 1H), 6.87 (s, 1H), 6.86 (s, 1H), 5.88 (s, 2H), 3.03-3.01 (m, 4H), 2.36 (s, 3H), 2.11 (s, 6H);  $^{13}\text{C}$  NMR (125 MHz,  $\text{CDCl}_3$ ):  $\delta$  159.8, 151.8, 149.7, 145.5, 131.7, 130.6, 130.5, 128.5, 122.8, 120.4, 106.8, 39.0, 34.9, 21.0, 13.3. MS ESI  $[\text{M}+\text{H}]^+ = 449.94$ .

**3-Bromo-5-(2-(6-(2,5-dimethyl-1*H*-pyrrol-1-yl)-4-methylpyridin-2-yl)ethyl)benzonitrile (27).**

A microwave vial was charged with CuCN (1 equiv.), pyridine (40.4  $\mu\text{l}$ ), and **22d** (223 mg, 0.5 mmol). The mixture was diluted with DMF to form a 0.2 M solution. The microwave vial was capped, and the reaction mixture was stirred at 150  $^\circ\text{C}$  for 20 h. The cap was removed, and the reaction mixture was diluted with ethyl acetate. The reaction crude product was washed with water and brine, dried with  $\text{Na}_2\text{SO}_4$ , concentrated under reduced pressure, and purified by flash column chromatography (ethyl acetate: hexanes 1:9) to give **27** as a white solid (88 mg, 45%).  $^1\text{H}$  NMR (500 MHz,  $\text{CDCl}_3$ ):  $\delta$  7.58 (s, 1H), 7.53 (s, 1H), 7.37 (s, 1H), 6.88 (s, 1H), 6.87 (s, 1H), 5.88 (s, 2H), 3.12-3.09 (m, 2H), 3.07-3.04 (m, 2H), 2.36 (s, 3H), 2.10 (s, 6H);  $^{13}\text{C}$  NMR (125 MHz,  $\text{CDCl}_3$ ):  $\delta$  159.3, 151.9, 149.9, 145.1, 136.4, 132.3, 130.8, 128.4, 122.8, 122.7, 120.6, 117.4, 114.0, 106.8, 38.7, 34.6, 21.0, 13.3. MS ESI  $[\text{M}+\text{H}]^+ = 394.04$ .

## Reference

1. Wang, H.-Y.; Qin, Y.; Li, H.; Roman, L. J.; Martásek, P.; Poulos, T. L.; Silverman, R. B. Potent and Selective Human Neuronal Nitric Oxide Synthase Inhibition by Optimization of the 2-Aminopyridine-Based Scaffold with a Pyridine Linker. *J. Med. Chem.* **2016**, 59, 4913-4925.
2. Wang, H.-Y.; Anderson, L. L. Interrupted Fischer-Indole Intermediates via Oxyarylation of Alkenyl Boronic Acids. *Org. Lett.* **2013**, 15, 3362-3365.
